# Supplementary material for: Does Preoperative Opioid Consumption Increase the Risk of Chronic Postoperative Opioid Use After Total Joint Arthroplasty?
Source: PubMed Central journal article supplement — Arthroplast Today. 2021 Jul 9;10:46–50. doi: 10.1016/j.artd.2021.05.012 (PMC8283033; doi:10.1016/j.artd.2021.05.012), 2021-07-09
Supplement: mmc6.pdf [file mmc6.pdf]

# INDIVIDUAL CONFLICT OF INTEREST STATEMENT

## *American Association of Hip and Knee Surgeons*

(Adopted from the American Academy of Orthopaedic Surgeons disclosure statement)

The following form **must be filled out completely and submitted by each author (example, 6 authors, 6 forms).**  
**All items require a response. If there is no relevant disclosure for a given item, enter "None."**

### **Does Pre-Operative Opioid Consumption Increase the Risk of Chronic Post-operative Opioid Use Following Total Joint Arthroplasty?**

---

#### **Manuscript Title**

- 1 Royalties from a company or supplier (The following conflicts were disclosed)  
None
- 2 Speakers bureau/paid presentations for a company or supplier (The following conflicts were disclosed)  
None
- 3A Paid employee for a company or supplier (The following conflicts were disclosed)  
None
- 3B Paid consultant for a company or supplier (The following conflicts were disclosed)  
None
- 3C Unpaid consultants for a company or supplier (The following conflicts were disclosed)  
None
- 4 Stock or stock options in a company or supplier (The following conflicts were disclosed)  
None
- 5 Research support from a company or supplier as a Principal Investigator (The following conflicts were disclosed)  
None
- 6 Other financial or material support from a company or supplier (The following conflicts were disclosed)  
None
- 7 Royalties, financial or material support from publishers (The following conflicts were disclosed)  
None
- 8 Medical/Orthopaedic publications editorial/governing board (The following conflicts were disclosed)  
None
- 9 Board member/committee appointments for a society (The following conflicts were disclosed)  
None

#### **Each author must sign AND print or type his/her name, date and submit a separate form**

In addition, one BLINDED Conflict of Interest form (no author names used) should be submitted per manuscript with all author disclosures

Tracy Borsinger

Author Name (Print or Type)

*Tracy Borsinger*

Author Signature

December 4, 2020

Date
