# Supplementary material for: Does Preoperative Opioid Consumption Increase the Risk of Chronic Postoperative Opioid Use After Total Joint Arthroplasty?
Source: PubMed Central journal article supplement — Arthroplast Today. 2021 Jul 9;10:46–50. doi: 10.1016/j.artd.2021.05.012 (PMC8283033; doi:10.1016/j.artd.2021.05.012), 2021-07-09
Supplement: mmc7.pdf [file mmc7.pdf]

# INDIVIDUAL CONFLICT OF INTEREST STATEMENT

## *American Association of Hip and Knee Surgeons*

(Adopted from the American Academy of Orthopaedic Surgeons disclosure statement)

The following form **must be filled out completely and submitted by each author (example, 6 authors, 6 forms).**  
**All items require a response. If there is no relevant disclosure for a given item, enter "None."**

---

### Manuscript Title

1. Royalties from a company or supplier (The following conflicts were disclosed)  
Medacta
  
2. Speakers bureau/paid presentations for a company or supplier (The following conflicts were disclosed)  
None
  
- 3A. Paid employee for a company or supplier (The following conflicts were disclosed)  
None
  
- 3B. Paid consultant for a company or supplier (The following conflicts were disclosed)  
Medacta  
Johnson & Johnson
  
- 3C. Unpaid consultants for a company or supplier (The following conflicts were disclosed)  
None
  
4. Stock or stock options in a company or supplier (The following conflicts were disclosed)  
Parvizi Surgical Innovations
  
5. Research support from a company or supplier as a Principal Investigator (The following conflicts were disclosed)  
None
  
6. Other financial or material support from a company or supplier (The following conflicts were disclosed)  
None
  
7. Royalties, financial or material support from publishers (The following conflicts were disclosed)  
Saunders Mosby-Elsevier
  
8. Medical/Orthopaedic publications editorial/governing board (The following conflicts were disclosed)  
None
  
9. Board member/committee appointments for a society (The following conflicts were disclosed)  
AAHKS – YAG Committee Member; EBM Committee Member  
AAOS – EBVQ Committee Member

### **Each author must sign AND print or type his/her name, date and submit a separate form**

In addition, one BLINDED Conflict of Interest form (no author names used) should be submitted per manuscript with all author disclosures.

---

Yale A. Fillingham

Author Name (Print or Type)

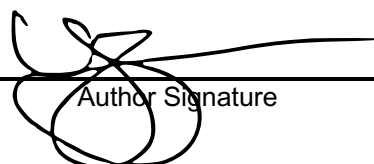

Author Signature

11/15/2020

Date
